# Supplementary material
Source: Springer Nature journal article supplement (https://www.springermedizin.de/resource/supplementary/12913_2013_3059_MOESM3_ESM.pdf/9532262)
Supplement: MOESM3 [file 9532262]

**n=320**  
Commenced  
survey

**Excluded n=20**  
Not eligible (Q1)  
n=7  
Incomplete  
demographic data  
n=13

**n=300**  
Completed  
demographics  
section

**Excluded n=46**  
Had not used a  
stroke CPG (Q15)

**n=254**  
Analysed data  
of those who  
had used a  
stroke CPG  
(Q15)
